# Supplementary material
Source: PubMed Central journal article supplement (PMC9269651)
Supplement: CJN.14321121SupplementaryData.pdf [file CJN.14321121SupplementaryData.pdf]

## **Supplemental Appendix**

*For the paper titled:*

**Apolipoprotein L1 high-risk genotypes and albuminuria in Sub-Saharan African populations**

## Table of Contents

|                                                                                                                                                                                                                                                                                    |    |
|------------------------------------------------------------------------------------------------------------------------------------------------------------------------------------------------------------------------------------------------------------------------------------|----|
| Supplemental Table 1: <i>APOLI</i> haplotypes (referred to as alleles G0, G1 and G2 for ease of comparison to other literature) based on three polymorphic loci on chromosome 22.....                                                                                              | 3  |
| Supplemental Table 2: Quality of imputation for the three variant positions and <i>APOLI</i> G0, G1 and G2 risk alleles on chromosome 22 .....                                                                                                                                     | 4  |
| Supplemental Table 3: <i>APOLI</i> alleles and high-risk genotypes using recessive models by ethnicity (data used for Figure 1 in the manuscript) .....                                                                                                                            | 6  |
| Supplemental Table 4: <i>APOLI</i> risk alleles and associated risk factors for kidney disease across the combined dataset of the Africa Wits-International Network for the Demographic Evaluation of Populations and their Health Partnership for Genomic Studies (AWI-Gen) ..... | 7  |
| Supplemental Table 5: <i>APOLI</i> associations with albuminuria across the Africa Wits-International Network for the Demographic Evaluation of Populations and their Health Partnership for Genomic Studies (AWI-Gen) study sites.....                                            | 8  |
| Supplemental Table 6: Association (OR (95% CI) between <i>APOLI</i> using additive, dominant, and recessive models and albuminuria alone, or as a composite endpoint.....                                                                                                          | 9  |
| Supplemental Table 7: Association (OR (95% CI) between <i>APOLI</i> using additive, dominant, and recessive models and albuminuria, low eGFR, and the composite endpoint.....                                                                                                      | 10 |
| Supplemental Table 8: Effect of genotypes (G1/G1 compared to G2/G2) on biomarkers of kidney disease .....                                                                                                                                                                          | 11 |
| Supplemental Table 9: <i>APOLI</i> associations with low eGFR <sup>1</sup> stratified by diabetes, hypertension, and HIV status .....                                                                                                                                              | 12 |
| Supplemental Table 10: <i>APOLI</i> associations with the composite endpoint <sup>1</sup> stratified by diabetes, hypertension, and HIV status.....                                                                                                                                | 13 |
| Supplemental Figure 1: Forest plot: association between high-risk <i>APOLI</i> genotypes (OR (95%CI)) and albuminuria by region.....                                                                                                                                               | 14 |
| Supplemental Appendix 1: Comparison of models between eGFR using CKD-EPI 2009 and CKD-EPI 2021 .....                                                                                                                                                                               | 15 |
| Supplemental Appendix 2: H3Africa Consortium AWI-Gen Study .....                                                                                                                                                                                                                   | 17 |

**Supplemental Table 1: *APOLI* haplotypes (referred to as alleles G0, G1 and G2 for ease of comparison to other literature) based on three polymorphic loci on chromosome 22**

| <i>APOLI</i> alleles | rs73885319<br>(36661906)* | rs60910145<br>(36662034)* | rs71785313<br>(36662041)* |
|----------------------|---------------------------|---------------------------|---------------------------|
| <b>G0</b>            | A                         | T                         | I : AATAATT               |
| <b>G1</b>            | G                         | G                         | I : AATAATT               |
|                      | G                         | T                         | I : AATAATT               |
| <b>G2</b>            | A                         | T                         | A                         |

\* nucleotide positions based on build hg19

**Supplemental Table 2: Quality of imputation for the three variant positions and *APOL1* G0, G1 and G2 risk alleles on chromosome 22**

| <sup>1</sup> Dataset | <sup>2</sup> Ancestry | Population                         | Risk alleles         | Risk alleles         | rs73885319          |                         |                         | rs60910145 |            |            | rs71785313 |            |            | Risk alleles |      |      |                     |
|----------------------|-----------------------|------------------------------------|----------------------|----------------------|---------------------|-------------------------|-------------------------|------------|------------|------------|------------|------------|------------|--------------|------|------|---------------------|
|                      |                       |                                    | <sup>3</sup> N (WGS) | <sup>4</sup> N (Imp) | <sup>5</sup> % Diff | <sup>6</sup> Freq (Imp) | <sup>7</sup> Freq (WGS) | % Diff     | Freq (Imp) | Freq (WGS) | % Diff     | Freq (Imp) | Freq (WGS) | G0           | G1   | G2   | <sup>8</sup> % Diff |
| 1000G                | AFR                   | Esan, Nigeria                      | 198                  | 198                  | 0                   | 50.5                    | 50.5                    | 0.0        | 49.5       | 49.5       | 2.0        | 12.6       | 11.6       | 37.9         | 49.5 | 12.6 | 2.0                 |
| 1000G                | AFR                   | Yoruba, Ibadan, Nigeria            | 216                  | 216                  | 0                   | 62.5                    | 62.5                    | 0.0        | 37.5       | 37.5       | 0.0        | 7.9        | 7.9        | 54.6         | 37.5 | 7.9  | 0.0                 |
| 1000G                | AFR                   | Gambia, Western Divisions          | 226                  | 226                  | 0                   | 75.7                    | 75.7                    | 0.0        | 24.3       | 24.3       | 0.9        | 19.9       | 19.5       | 55.8         | 24.3 | 19.9 | 0.9                 |
| 1000G                | AFR                   | Afro-Caribbean, Barbados           | 192                  | 192                  | 0                   | 74.0                    | 74.0                    | 0.0        | 25.5       | 25.5       | 0.0        | 13.0       | 13.0       | 60.9         | 26.0 | 13.0 | 0.0                 |
| 1000G                | SAS                   | Bengali, Bangladesh                | 172                  | 172                  | 0                   | 100.0                   | 100.0                   | 0.0        | 0.0        | 0.0        | 0.0        | 0.0        | 0.0        | 100.0        | 0.0  | 0.0  | 0.0                 |
| 1000G                | EUR                   | British, United Kingdom            | 182                  | 182                  | 0                   | 100.0                   | 100.0                   | 0.0        | 0.0        | 0.0        | 0.0        | 0.0        | 0.0        | 100.0        | 0.0  | 0.0  | 0.0                 |
| 1000G                | EAS                   | Dai, Xishuangbanna, China          | 186                  | 186                  | 0                   | 100.0                   | 100.0                   | 0.0        | 0.0        | 0.0        | 0.0        | 0.0        | 0.0        | 100.0        | 0.0  | 0.0  | 0.0                 |
| 1000G                | AMR                   | Colombian, Medellin, Colombia      | 188                  | 188                  | 0                   | 100.0                   | 100.0                   | 0.0        | 0.0        | 0.0        | 0.0        | 0.5        | 0.5        | 99.5         | 0.0  | 0.5  | 0.0                 |
| 1000G                | EUR                   | Finnish, Finland                   | 198                  | 198                  | 0                   | 100.0                   | 100.0                   | 0.0        | 0.0        | 0.0        | 0.0        | 0.0        | 0.0        | 100.0        | 0.0  | 0.0  | 0.0                 |
| 1000G                | SAS                   | Gujarati Indian, Houston, Texas    | 206                  | 206                  | 0                   | 100.0                   | 100.0                   | 0.0        | 0.0        | 0.0        | 0.0        | 0.0        | 0.0        | 100.0        | 0.0  | 0.0  | 0.0                 |
| 1000G                | EAS                   | Han, Beijing, China                | 206                  | 206                  | 0                   | 100.0                   | 100.0                   | 0.0        | 0.0        | 0.0        | 0.0        | 0.0        | 0.0        | 100.0        | 0.0  | 0.0  | 0.0                 |
| 1000G                | SAS                   | Indian Telugu, United Kingdom      | 204                  | 204                  | 0                   | 100.0                   | 100.0                   | 0.0        | 0.0        | 0.0        | 0.0        | 0.0        | 0.0        | 100.0        | 0.0  | 0.0  | 0.0                 |
| 1000G                | EAS                   | Japanese, Tokyo, Japan             | 208                  | 208                  | 0                   | 100.0                   | 100.0                   | 0.0        | 0.0        | 0.0        | 0.0        | 0.0        | 0.0        | 100.0        | 0.0  | 0.0  | 0.0                 |
| 1000G                | EAS                   | Kinh, Ho Chi Minh City, Vietnam    | 198                  | 198                  | 0                   | 100.0                   | 100.0                   | 0.0        | 0.0        | 0.0        | 0.0        | 0.0        | 0.0        | 100.0        | 0.0  | 0.0  | 0.0                 |
| 1000G                | AFR                   | African Ancestry, South-West USA   | 122                  | 122                  | 0                   | 77.9                    | 77.9                    | 0.0        | 22.1       | 22.1       | 0.0        | 9.8        | 9.8        | 68.0         | 22.1 | 9.8  | 0.0                 |
| 1000G                | AMR                   | Mexican Ancestry, Los Angeles, USA | 128                  | 128                  | 0                   | 100.0                   | 100.0                   | 0.0        | 0.0        | 0.0        | 0.0        | 0.0        | 0.0        | 100.0        | 0.0  | 0.0  | 0.0                 |
| 1000G                | AFR                   | Mende, Sierra Leone                | 170                  | 170                  | 0                   | 87.6                    | 87.6                    | 0.0        | 12.4       | 12.4       | 0.0        | 18.2       | 18.2       | 69.4         | 12.4 | 18.2 | 0.0                 |
| 1000G                | AMR                   | Peruvian, Lima, Peru               | 170                  | 170                  | 0                   | 100.0                   | 100.0                   | 0.0        | 0.0        | 0.0        | 0.0        | 0.0        | 0.0        | 100.0        | 0.0  | 0.0  | 0.0                 |
| 1000G                | AMR                   | Puerto Rican, Puerto Rico          | 208                  | 208                  | 0                   | 97.1                    | 97.1                    | 0.0        | 2.9        | 2.9        | 0.0        | 2.4        | 2.4        | 94.7         | 2.9  | 2.4  | 0.0                 |
| 1000G                | SAS                   | Punjabi, Lahore, Pakistan          | 192                  | 192                  | 0                   | 100.0                   | 100.0                   | 0.0        | 0.0        | 0.0        | 0.0        | 0.0        | 0.0        | 100.0        | 0.0  | 0.0  | 0.0                 |
| AWIWGS               | AFR                   | Agincourt, South Africa            | 48                   | 48                   | 0                   | 95.8                    | 95.8                    | 0.0        | 4.2        | 4.2        | 0.0        | 25.0       | 25.0       | 70.8         | 4.2  | 25.0 | 0.0                 |
| 1000G                | EAS                   | Southern Han, China                | 210                  | 210                  | 0                   | 100.0                   | 100.0                   | 0.0        | 0.0        | 0.0        | 0.0        | 0.0        | 0.0        | 100.0        | 0.0  | 0.0  | 0.0                 |
| 1000G                | SAS                   | Sri Lankan Tamil, United Kingdom   | 204                  | 204                  | 0                   | 100.0                   | 100.0                   | 0.0        | 0.0        | 0.0        | 0.0        | 0.0        | 0.0        | 100.0        | 0.0  | 0.0  | 0.0                 |
| 1000G                | EUR                   | Toscani, Italy                     | 214                  | 214                  | 0                   | 100.0                   | 100.0                   | 0.0        | 0.0        | 0.0        | 0.0        | 0.0        | 0.0        | 100.0        | 0.0  | 0.0  | 0.0                 |

| <sup>1</sup> Dataset       | <sup>2</sup> Ancestry | Population            | Risk alleles         | Risk alleles         | rs73885319          |                         |                         | rs60910145 |            |            | rs71785313 |            |            | Risk alleles |      |      |                     |
|----------------------------|-----------------------|-----------------------|----------------------|----------------------|---------------------|-------------------------|-------------------------|------------|------------|------------|------------|------------|------------|--------------|------|------|---------------------|
|                            |                       |                       | <sup>3</sup> N (WGS) | <sup>4</sup> N (Imp) | <sup>5</sup> % Diff | <sup>6</sup> Freq (Imp) | <sup>7</sup> Freq (WGS) | % Diff     | Freq (Imp) | Freq (WGS) | % Diff     | Freq (Imp) | Freq (WGS) | G0           | G1   | G2   | <sup>8</sup> % Diff |
| 1000G                      | EUR                   | Utah, USA             | 198                  | 198                  | 0                   | 100.0                   | 100.0                   | 0.0        | 0.0        | 0.0        | 0.0        | 0.0        | 0.0        | 100.0        | 0.0  | 0.0  | 0.0                 |
| AWIWGS                     | AFR                   | Soweto, South Africa  | 100                  | 100                  | 0                   | 89.0                    | 89.0                    | 0.0        | 11.0       | 11.0       | 2.0        | 17.0       | 16.0       | 72.0         | 11.0 | 17.0 | 2.0                 |
| AGVP                       | AFR                   | Zulu, South Africa    | 200                  | 200                  | 0                   | 87.5                    | 87.5                    | 1.0        | 12.5       | 12.0       | 2.0        | 15.0       | 15.0       | 72.5         | 12.5 | 15.0 | 2.0                 |
| AWIWGS                     | AFR                   | Dikgale, South Africa | 52                   | 52                   | 0                   | 92.3                    | 92.3                    | 0.0        | 7.7        | 7.7        | 0.0        | 17.3       | 17.3       | 75.0         | 7.7  | 17.3 | 0.0                 |
| 1000G                      | EUR                   | Iberian, Spain        | 214                  | 214                  | 0                   | 100.0                   | 100.0                   | 0.0        | 0.0        | 0.0        | 0.9        | 0.5        | 0.0        | 99.5         | 0.0  | 0.5  | 0.9                 |
| 1000G                      | AFR                   | Luhya, Webuye, Kenya  | 198                  | 198                  | 0                   | 94.4                    | 94.4                    | 0.0        | 5.6        | 5.6        | 1.0        | 8.6        | 9.1        | 85.9         | 5.6  | 8.6  | 1.0                 |
| AGVP                       | AFR                   | Baganda, Uganda       | 200                  | 200                  | 0                   | 94.5                    | 94.5                    | 0.0        | 5.5        | 5.5        | 3.0        | 8.0        | 7.5        | 86.5         | 5.5  | 8.0  | 3.0                 |
| AGVP                       | AFR                   | Somali, Somalia       | 48                   | 48                   | 0                   | 100.0                   | 100.0                   | 0.0        | 0.0        | 0.0        | 0.0        | 2.1        | 2.1        | 97.9         | 0.0  | 2.1  | 0.0                 |
| AGVP                       | AFR                   | Gumuz, Ethiopia       | 48                   | 48                   | 0                   | 100.0                   | 100.0                   | 0.0        | 0.0        | 0.0        | 4.2        | 2.1        | 4.2        | 97.9         | 0.0  | 2.1  | 4.2                 |
| AGVP                       | AFR                   | Amhara, Ethiopia      | 48                   | 48                   | 0                   | 100.0                   | 100.0                   | 0.0        | 0.0        | 0.0        | 0.0        | 0.0        | 0.0        | 100.0        | 0.0  | 0.0  | 0.0                 |
| AGVP                       | AFR                   | Oromo, Ethiopia       | 48                   | 48                   | 0                   | 100.0                   | 100.0                   | 0.0        | 0.0        | 0.0        | 0.0        | 0.0        | 0.0        | 100.0        | 0.0  | 0.0  | 0.0                 |
| AGVP                       | AFR                   | Wolayta, Ethiopia     | 48                   | 48                   | 0                   | 100.0                   | 100.0                   | 0.0        | 0.0        | 0.0        | 0.0        | 0.0        | 0.0        | 100.0        | 0.0  | 0.0  | 0.0                 |
| AGVP/<br>1000G/<br>AWI-WGS | AFR                   | -                     | 1081                 | 1081                 | 0                   | 81.6                    | 81.6                    | 0.1        | 18.2       | 18.2       | 1.0        | 11.9       | 11.9       | 69.8         | 18.3 | 11.9 | 1.0                 |

<sup>1</sup>Dataset - Dataset of populations (1000G - 1000 Genomes Project; AWIWGS - AWI-GEN whole genome sequencing; AGVP - African Genome Variation Project).

<sup>2</sup>Ancestry - ancestry of sample, AFR - African, SAS - South Asian, EAS - East Asian, AMR - Add Mixed American, EUR – European.

<sup>3</sup>N (WGS) - individual number extracted from whole genome sequencing.

<sup>4</sup>N (Imp) - individual number extracted from imputation.

<sup>5</sup>% Diff - percent difference between frequencies using whole genome sequencing and frequencies after imputation of 36661906, 36662034, 36662034.

<sup>6</sup>Freq (Imp) - frequencies after imputation of 36661906, 36662034, 36662034.

<sup>7</sup>Freq (WGS) - frequencies from whole genome sequencing of 36661906, 36662034, 36662034.

<sup>8</sup>% Diff - percent difference between frequencies using whole genome sequencing and from imputation of G0, G1 and G2.

**Supplemental Table 3: *APOLI* alleles and high-risk genotypes using recessive models by ethnicity (data used for Figure 1 in the manuscript)**

| <b>Ethnicity</b> | <b>N</b> | <b>G0 (%)</b> | <b>G1 (%)</b> | <b>G2 (%)</b> | <b>High-risk* Genotypes (%)</b> | <b>African Region</b> |
|------------------|----------|---------------|---------------|---------------|---------------------------------|-----------------------|
| Kamba            | 656      | 86            | 5             | 9             | 1                               | East                  |
| Kikuyu           | 1292     | 90            | 4             | 6             | 1                               | East                  |
| Kisii            | 94       | 87            | 4             | 9             | 0.0                             | East                  |
| Luhya            | 554      | 87            | 7             | 7             | 1                               | East                  |
| Luo              | 714      | 85            | 7             | 9             | 2                               | East                  |
| Somali           | 96       | 100           | 0             | 0             | 0                               | East                  |
| Bapedi           | 2314     | 76            | 7             | 17            | 5                               | South                 |
| Ndebele          | 72       | 75            | 10            | 15            | 6                               | South                 |
| Sotho            | 762      | 77            | 8             | 16            | 6                               | South                 |
| Swati            | 298      | 70            | 11            | 20            | 7                               | South                 |
| Tsonga           | 4188     | 66            | 10            | 24            | 12                              | South                 |
| Tswana           | 480      | 78            | 9             | 14            | 7                               | South                 |
| Venda            | 158      | 68            | 10            | 22            | 17                              | South                 |
| Xhosa            | 348      | 76            | 14            | 10            | 8                               | South                 |
| Zulu             | 1272     | 74            | 10            | 16            | 8                               | South                 |
| Bulsa            | 84       | 70            | 10            | 20            | 7                               | West                  |
| Gourounsi        | 204      | 75            | 12            | 13            | 3                               | West                  |
| Kassena          | 1962     | 75            | 13            | 12            | 5                               | West                  |
| Mossi            | 3700     | 78            | 13            | 9             | 5                               | West                  |
| Nankana          | 1540     | 77            | 11            | 13            | 5                               | West                  |

\*Kidney disease risk was determined by the number of risk alleles carried: high-risk genotypes comprised 2 risk alleles in any combination (G1/G1; G1/G2; G2/G2);

Categories reported as number (N) and percent (%); percentages may sum to +/- 100 from rounding up

**Supplemental Table 4: *APOLI* risk alleles and associated risk factors for kidney disease across the combined dataset of the Africa Wits-International Network for the Demographic Evaluation of Populations and their Health Partnership for Genomic Studies (AWI-Gen)**

| Variable <sup>1</sup>                                  | Overall           | <i>APOLI</i> risk alleles |                  |              |
|--------------------------------------------------------|-------------------|---------------------------|------------------|--------------|
|                                                        |                   | 0                         | 1                | 2            |
| Sample size <sup>2</sup>                               | <b>N=10,769</b>   | <b>N=6,275</b>            | <b>N=3,844</b>   | <b>N=650</b> |
| Age - years                                            | 52 (8)            | 51 (8)                    | 52 (9)           | 53 (9)       |
| Male N (%)                                             | 4,876 (45)        | 2,847 (45)                | 1,743 (45)       | 286 (44)     |
| Female N (%)                                           | 5,893 (55)        | 3,428 (55)                | 2,101 (55)       | 364 (56)     |
| Diabetes mellitus N (%)                                | 695/10,642 (7)    | 403/6,204 (6)             | 246/3,796 (6)    | 46/642 (7)   |
| Hypertension N (%)                                     | 3,992/10,769 (37) | 2,209/6,275 (35)          | 1,501/3,844 (39) | 282/650 (43) |
| HIV infection N (%)                                    | 1,318/9,970 (13)  | 754/5,812 (13)            | 471/3,552 (13)   | 93/606 (15)  |
| BMI (kg/m <sup>2</sup> ) <sup>3,4</sup>                | <b>N=10,313</b>   | <b>N=6,011</b>            | <b>N=3,680</b>   | <b>N=622</b> |
| Underweight (<18.5)                                    | 1,175 (11)        | 708 (12)                  | 410 (11)         | 57 (9)       |
| Normal (18.5-24.9)                                     | 5,055 (49)        | 3,014 (50)                | 1,783 (49)       | 258 (43)     |
| Overweight (25.0-29.9)                                 | 1,961 (19)        | 1,172 (19)                | 681 (19)         | 108 (18)     |
| Obese (30.0 +)                                         | 2,122 (21)        | 1,174 (19)                | 765 (21)         | 183 (30)     |
| <b>Socioeconomic status as quintiles<sup>5,6</sup></b> | <b>N=10619</b>    | <b>N=6205</b>             | <b>N=3771</b>    | <b>N=643</b> |
| 1                                                      | 1,572 (15)        | 883 (14)                  | 576 (15)         | 113 (18)     |
| 2                                                      | 2,322 (22)        | 1,347 (22)                | 834 (22)         | 141 (22)     |
| 3                                                      | 1,846 (17)        | 1,105 (18)                | 638 (17)         | 103 (16)     |
| 4                                                      | 2,250 (21)        | 1,320 (21)                | 804 (21)         | 126 (20)     |
| 5                                                      | 2,629 (25)        | 1,550 (25)                | 919 (24)         | 160 (25)     |

<sup>1</sup>All data reported as mean (SD) unless stated otherwise; categories reported as number (N) and percent (%); percentages may sum to +/- 100 due to rounding up

<sup>2</sup>Where sample sizes differed from what is represented for the variable, the sample size was included as a denominator

<sup>3</sup>BMI: WHO classification for body mass index (<https://www.euro.who.int/en/health-topics/disease-prevention/nutrition/a-healthy-lifestyle/body-mass-index-bmi>).

<sup>4</sup>BMI: missing data N=456/10,769 (4%)

<sup>4</sup>Socioeconomic status: assessed using a validated tool appropriate for assessing wealth in low income settings, household assets are scored, and based on the score, data are represented by quintile, with the poorest in the first quintile<sup>1</sup>.

<sup>5</sup>Socioeconomic status: missing data N=150/10,769 (1%)

**Reference:**

1. Ali SA, Soo C, Agongo G, Alberts M, Amenga-Etego L, Boua RP, Choudhury A, Crowther NJ, Depuur C, Gómez-Olivé FX: Genomic and environmental risk factors for cardiometabolic diseases in Africa: methods used for Phase 1 of the AWI-Gen population cross-sectional study. *Global Health Action*, 11: 1507133, 2018.

**Supplemental Table 5: *APOLI* associations with albuminuria across the Africa Wits-International Network for the Demographic Evaluation of Populations and their Health Partnership for Genomic Studies (AWI-Gen) study sites**

| Site                             | Recessive<br>OR (95% CI)  | Dominant<br>OR (95% CI) | Additive<br>OR (95% CI)   |
|----------------------------------|---------------------------|-------------------------|---------------------------|
| <b>Agincourt</b><br>South Africa | <b>1.75 (1.12 – 2.56)</b> | 1.03 (0.79 – 1.37)      | 1.18 (0.96 – 1.44)        |
| <b>Soweto</b><br>South Africa    | 1.07 (0.43 – 2.68)        | 1.15 (0.74 – 1.79)      | 1.10 (0.77 – 1.58)        |
| <b>Digkale</b><br>South Africa   | 1.12 (0.54 – 2.66)        | 1.13 (0.76 – 1.71)      | 1.12 (0.81 – 1.54)        |
| <b>Nairobi</b><br>Kenya          | 2.78 (0.75 – 10.39)       | 1.10 (0.73 – 1.65)      | 1.16 (0.80 – 1.68)        |
| <b>Nanoro</b><br>Burkina Faso    | <b>2.37 (1.21 – 4.62)</b> | 1.74 (1.19 – 2.54)      | <b>1.64 (1.22 – 2.22)</b> |
| <b>Navrongo</b><br>Ghana         | 1.68 (0.78 – 3.63)        | 0.95 (0.64 – 1.42)      | 1.05 (0.75 – 1.46)        |

For each model (recessive, dominant, additive) the associations between *APOLI* risk alleles and albuminuria are presented as the odd ratio (95% confidence interval).

Models were adjusted for age, sex, BMI, diabetes mellitus status, hypertension status, and HIV status.



**Supplemental Table 6: Association (OR (95% CI) between *APOLI* using additive, dominant, and recessive models and albuminuria alone, or as a composite endpoint**

| Model*           | Albuminuria <sup>1</sup>  |                  | Composite endpoint <sup>2</sup> |                  |
|------------------|---------------------------|------------------|---------------------------------|------------------|
|                  | BMI <sup>3</sup> adjusted | BMI unadjusted   | BMI adjusted                    | BMI unadjusted   |
| <b>Additive</b>  | 1.39 (1.09-1.76)          | 1.37 (1.08-1.74) | 1.16 (0.93-1.45)                | 1.16 (0.93-1.45) |
| <b>Dominant</b>  | 1.12 (0.97-1.31)          | 1.12 (0.97-1.30) | 1.03 (0.90-1.19)                | 1.03 (0.90-1.19) |
| <b>Recessive</b> | 1.63 (1.25-2.12)          | 1.59 (1.22-2.08) | 1.37 (1.06-1.78)                | 1.36 (1.05-1.76) |

\*adjusted for site as a random variable; and age, sex, diabetes mellitus status, hypertension status, and HIV status as fixed variables

<sup>1</sup>Albuminuria: defined as albumin:creatinine ratio >30mg/g

<sup>2</sup>Composite endpoint: defined as low eGFR (eGFR <60ml/min/1.73m<sup>2</sup>) and/or albuminuria

<sup>3</sup>BMI: body mass index

**Supplemental Table 7: Association (OR (95% CI) between *APOLI* using additive, dominant, and recessive models and albuminuria, low eGFR, and the composite endpoint**

| Model*           | Albuminuria <sup>1</sup>  |                  | Composite endpoint <sup>2</sup> |                  | Low eGFR <sup>3</sup> |                  |
|------------------|---------------------------|------------------|---------------------------------|------------------|-----------------------|------------------|
|                  | SES <sup>4</sup> adjusted | SES unadjusted   | SES adjusted                    | SES unadjusted   | SES adjusted          | SES unadjusted   |
| <b>Additive</b>  | 1.39 (1.09-1.76)          | 1.39 (1.09-1.76) | 1.16 (0.93-1.45)                | 1.16 (0.93-1.45) | 0.78 (0.52-1.19)      | 0.79 (0.52-1.19) |
| <b>Dominant</b>  | 1.12 (0.97-1.31)          | 1.13 (0.97-1.31) | 1.03 (0.90-1.19)                | 1.03 (0.90-1.19) | 0.86 (0.67-1.11)      | 0.86 (0.67-1.11) |
| <b>Recessive</b> | 1.63 (1.25-2.12)          | 1.63 (1.25-2.12) | 1.37 (1.06-1.78)                | 1.37 (1.06-1.78) | 0.87 (0.52-1.47)      | 0.87 (0.52-1.48) |

\*adjusted for site as a random variable; and age, sex, diabetes mellitus status, hypertension status, and HIV status as fixed variables

<sup>1</sup>Albuminuria: defined as albumin:creatinine ratio >30mg/g

<sup>2</sup>Composite endpoint: defined as low eGFR and/ or albuminuria

<sup>3</sup>low eGFR: defined as eGFR <60ml/min/1.73m<sup>2</sup>

<sup>4</sup>SES: socioeconomic status

**Supplemental Table 8: Effect of genotypes (G1/G1 compared to G2/G2) on biomarkers of kidney disease**

| <b>Biomarkers of kidney disease</b>              | <b>Odds ratio (95% CI); p-value</b> |
|--------------------------------------------------|-------------------------------------|
| Albuminuria (ACR >30mg/g)                        | 2.19 (1.01-4.76); p=0.047           |
| Low eGFR (eGFR<60ml/min/1.73m <sup>2</sup> )     | 0.44 (0.05-3.93); p=0.46            |
| Composite endpoint (albuminuria and/or low eGFR) | 1.8 (0.83-3.9); p=0.137             |

Logistic mixed models were adjusted for site as a random variable and age, sex, BMI, diabetes mellitus status, hypertension status and HIV status as fixed variables

**Supplemental Table 9: APOL1 associations with low eGFR<sup>1</sup> stratified by diabetes, hypertension, and HIV status**

| <b>Comorbidity Status</b>  | <b>Low eGFR<sup>1</sup> n/N (%)</b> | <b>Low eGFR<sup>1</sup> (OR (95% CI) (age + sex adjusted model)<sup>2</sup></b> | <b>Low eGFR<sup>1</sup> (OR 95% CI) (fully-adjusted model)<sup>3</sup></b> | <b>P<sub>interaction term</sub> (age +sex adjusted model)<sup>2</sup></b> |
|----------------------------|-------------------------------------|---------------------------------------------------------------------------------|----------------------------------------------------------------------------|---------------------------------------------------------------------------|
| <b><u>Diabetes</u></b>     |                                     |                                                                                 |                                                                            |                                                                           |
| <b>Absent</b>              | 285/9,861 (2.9)                     | 1.19 (0.76-1.86)                                                                | 1.05 (0.62-1.77)                                                           | 0.10                                                                      |
| <b>Present</b>             | 58/687 (8.4)                        | 0.20 (0.03-1.49)                                                                | N/A <sup>4</sup>                                                           |                                                                           |
| <b><u>Hypertension</u></b> |                                     |                                                                                 |                                                                            |                                                                           |
| <b>Absent</b>              | 141/6,708 (2.1)                     | 0.76 (0.33-1.75)                                                                | 0.43 (0.13-1.37)                                                           | 0.39                                                                      |
| <b>Present</b>             | 206/3,934 (5.2)                     | 1.07 (0.64-1.81)                                                                | 1.15 (0.63-2.08)                                                           |                                                                           |
| <b><u>HIV</u></b>          |                                     |                                                                                 |                                                                            |                                                                           |
| <b>Negative</b>            | 255/8,582 (3.0)                     | 0.78 (0.45-1.36)                                                                | 0.66 (0.35-1.27)                                                           | 0.11                                                                      |
| <b>Positive</b>            | 54/1,290 (4.2)                      | 1.80 (0.73-4.43)                                                                | 1.8 (0.72-4.48)                                                            |                                                                           |

<sup>1</sup> Low eGFR: eGFR <60ml/min/1.73m<sup>2</sup>

<sup>2</sup> Logistic mixed models were adjusted for age and sex as fixed variables

<sup>3</sup> Logistic mixed models were adjusted for site as a random variable and age, sex, BMI, diabetes mellitus status, hypertension status and HIV status as fixed variables. Some participants were excluded from the fully adjusted model due to missing data.

<sup>4</sup> N/A: not applicable as data too few for statistical analysis

**Supplemental Table 10: APOL1 associations with the composite endpoint<sup>1</sup> stratified by diabetes, hypertension, and HIV status**

| <b>Comorbidity Status</b>  | <b>Composite endpoint<sup>1</sup> n/N (%)</b> | <b>Composite endpoint<sup>1</sup> (OR (95% CI) (age + sex adjusted model)<sup>2</sup></b> | <b>Composite endpoint<sup>1</sup> (OR 95% CI) (fully-adjusted model)<sup>3</sup></b> | <b>P<sub>interaction</sub> term (age +sex adjusted model)<sup>2</sup></b> |
|----------------------------|-----------------------------------------------|-------------------------------------------------------------------------------------------|--------------------------------------------------------------------------------------|---------------------------------------------------------------------------|
| <b><u>Diabetes</u></b>     |                                               |                                                                                           |                                                                                      |                                                                           |
| <b>Absent</b>              | 910/8,222 (11.1)                              | 1.49 (1.15-1.93)                                                                          | 1.47 (1.12-1.92)                                                                     | 0.14                                                                      |
| <b>Present</b>             | 150/520 (28.8)                                | 0.81 (0.35-1.88)                                                                          | 0.69 (0.28-1.67)                                                                     |                                                                           |
| <b><u>Hypertension</u></b> |                                               |                                                                                           |                                                                                      |                                                                           |
| <b>Absent</b>              | 474/5,744 (8.3)                               | 1.57 (1.08-2.26)                                                                          | 1.61 (1.11-2.34)                                                                     | 0.23                                                                      |
| <b>Present</b>             | 600/3,071 (19.5)                              | 1.24 (0.88-1.74)                                                                          | 1.18 (0.83-1.69)                                                                     |                                                                           |
| <b><u>HIV</u></b>          |                                               |                                                                                           |                                                                                      |                                                                           |
| <b>Negative</b>            | 808/7,465 (10.8)                              | 1.34 (1.01-1.79)                                                                          | 1.36 (1.01-1.82)                                                                     | 0.99                                                                      |
| <b>Positive</b>            | 223/1,105 (20.2)                              | 1.39 (0.8-2.38)                                                                           | 1.4 (0.81-2.42)                                                                      |                                                                           |

<sup>1</sup> Composite endpoint: low eGFR and/or albuminuria

<sup>2</sup> Logistic mixed models were adjusted for age and sex as fixed variables

<sup>3</sup> Logistic mixed models were adjusted for site as a random variable and age, sex, BMI, diabetes mellitus status, hypertension status and HIV status as fixed variables. Some participants were excluded from the fully adjusted model due to missing data.

**Supplemental Figure 1: Forest plot: association between high-risk *APOLI* genotypes (OR (95%CI)) and albuminuria by region**

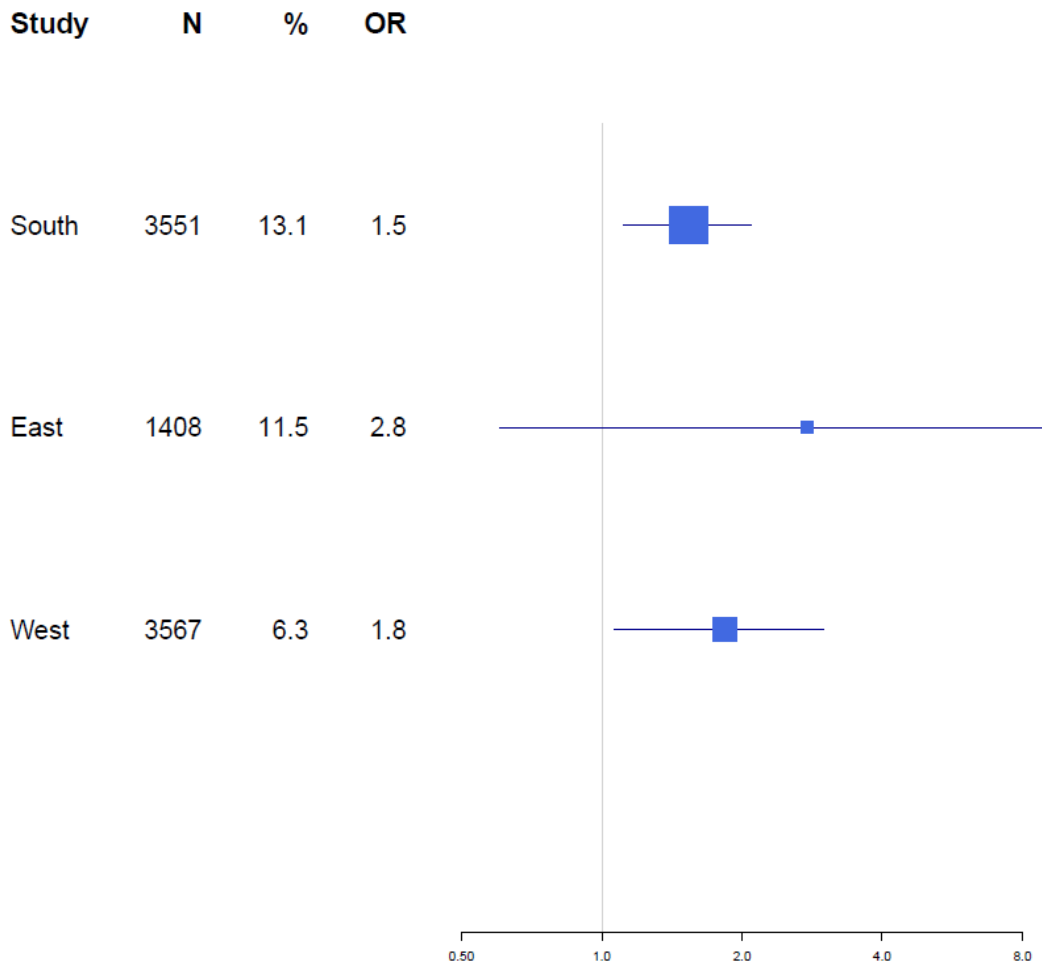

Regions: **East:** East Africa (Kenya); **West:** West Africa (Burkina Faso and Ghana); **South:** South Africa.  
OR (odds ratio) with 95% CI (confidence interval).

## Supplemental Appendix 1: Comparison of models between eGFR using CKD-EPI 2009 and CKD-EPI 2021

### Objectives

We have compared the CKD-EPI (creatinine) equation (2009)<sup>1</sup> with the CKD-EPI (creatinine) equation (2021)<sup>2</sup>. From our perspective, race-based coefficients for the MDRD and CKD-EPI equations have only been validated in a handful of small studies in Africa and are known to overestimate GFR in continental African populations<sup>3-7</sup>. As such, we exclude adjustments for race (based on African Americans) in the estimation of GFR in Africa. Even without race-based adjustments, the eGFR equations still appear to overestimate GFR, thus underdiagnosing CKD.

### Results

As a case in point in our dataset, when we used the CKD-EPI(creatinine) equation (2009) without race-based adjustment, the prevalence of CKD (defined as eGFR <60ml/min/1.73m<sup>2</sup>) was 347/10,642 (3.3%). However, when we used the CKD-EPI (creatinine) 2021 equation, CKD prevalence was reduced to 2.5% with 81 individuals reclassified by CKD stage. In the absence of a comparison to a gold standard measured GFR, we have no way to ascertain whether the observed changes are true or reflect an artefact of the modelling.

We have included the comparison of the two CKD-EPI equations for your perusal (see below):

1. **Figure A** demonstrates the correlation with a coefficient of determination  $R^2 = 0.996$
2. **Figure B** demonstrates the associations between eGFR and additive, dominant, and recessive models for *APOL1* risk alleles for each equation

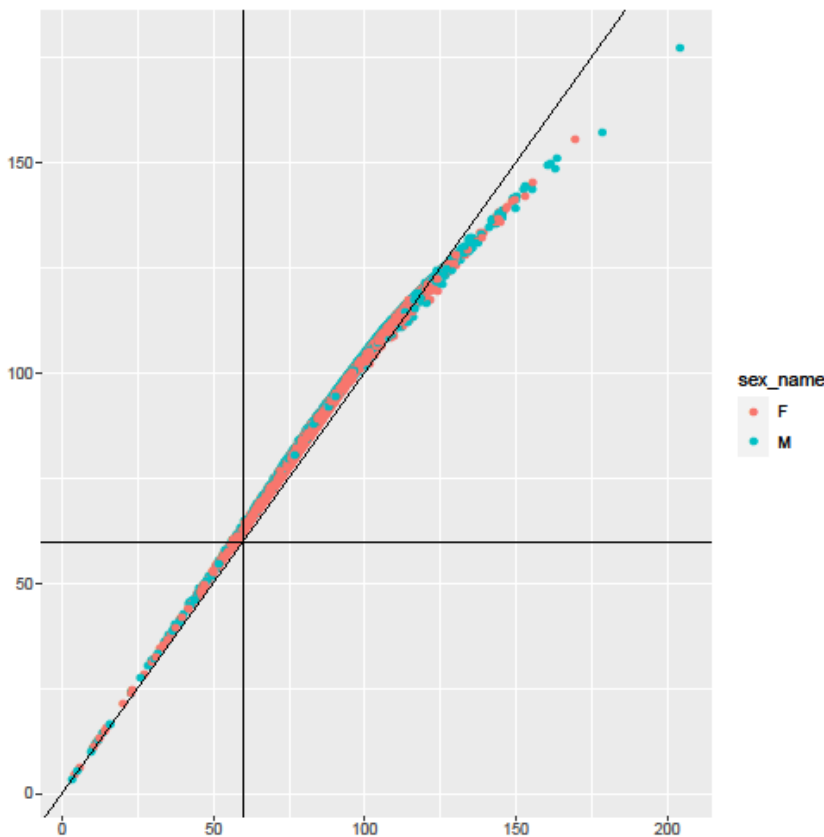

**Figure A** Correlation between CKD-EPI (creatinine) 2021 equation (y-axis) and CKD-EPI (creatinine) 2009 equation (x-axis)

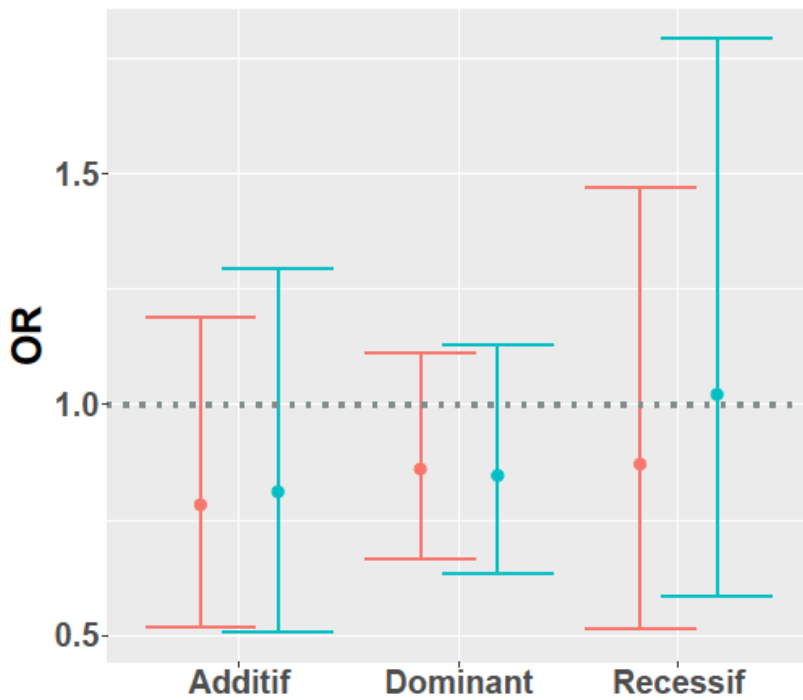

**Figure B** Association between eGFR calculated using CKD-EPI (creatinine) 2009 (orange) and CKD-EPI (creatinine) 2021 (blue) and additive, dominant, and recessive models for *APOL1* risk alleles; OR (odds ratio) with 95% CI (confidence interval)

Conclusion

Since the differences between both CKD-EPI equations are so small, we would prefer to use the CKD-EPI (creatinine) 2009 equation so our results can be compared to other published results using the CKD-EPI (2009) equation.

References

1. Levey AS, Stevens LA, Schmid CH, et al. A new equation to estimate glomerular filtration rate. *Annals of internal medicine* 2009;150:604-12.
2. Inker LA, Eneanya ND, Coresh J, et al. New creatinine-and cystatin C–based equations to estimate GFR without race. *New England Journal of Medicine* 2021.
3. van Deventer HE, George JA, Paiker JE, Becker PJ, Katz IJ. Estimating glomerular filtration rate in black South Africans by use of the modification of diet in renal disease and Cockcroft-Gault equations. *Clinical chemistry* 2008;54:1197-202.
4. Wyatt CM, Schwartz GJ, Ong'or WO, et al. Estimating kidney function in HIV-infected adults in Kenya: comparison to a direct measure of glomerular filtration rate by iohexol clearance. *PloS one* 2013;8:e69601.
5. Seape T, Gounden V, van Deventer HE, Candy GP, George JA. Cystatin C-and creatinine-based equations in the assessment of renal function in HIV-positive patients prior to commencing highly active antiretroviral therapy. *Annals of Clinical Biochemistry: An international journal of biochemistry and laboratory medicine* 2016;53:58-66.
6. Bukabau JB, Sumaili EK, Cavalier E, et al. Performance of glomerular filtration rate estimation equations in Congolese healthy adults: the inopportunity of the ethnic correction. *PloS one* 2018;13:e0193384.
7. Eastwood JB, Kerry SM, Plange-Rhule J, et al. Assessment of GFR by four methods in adults in Ashanti, Ghana: the need for an eGFR equation for lean African populations. *Nephrology Dialysis Transplantation* 2010;25:2178-87.



## Supplemental Appendix 2: H3Africa Consortium AWI-Gen Study

Core AWI-Gen group to be acknowledged in publications

The table below shows the members of the AWI-Gen Study who contributed significantly to the work of the study. Authors of specific papers are solely responsible for the papers to which their names are attached; membership of the study does not in itself imply that the person takes responsibility for any paper.

### Key AWI-Gen contributors over extended period

| Centre           | Names                        | Affiliation | AWI-Gen 1 | AWI-Gen 2 |
|------------------|------------------------------|-------------|-----------|-----------|
| <b>Agincourt</b> | Stephen Tollman              | 7, 8        | √         | √         |
|                  | Alisha Wade                  | 7           | √         | √         |
|                  | Chodziwadziwa Kabudula       | 7           | √         | √         |
|                  | Daniel Ohene-Kwofie          | 7           | √         | √         |
|                  | F. Xavier Gómez-Olivé        | 7, 8        | √         | √         |
|                  | Floidy Wafawanaka            | 7           | √         | √         |
|                  | Kathleen Kahn                | 7, 8        | √         | √         |
|                  | Mwawi Gondwe                 | 7           |           | √         |
|                  | Rhian Twine                  | 7           | √         | √         |
|                  | Ryan Wagner                  | 7, 8        | √         | √         |
| <b>APHRC</b>     | Catherine Kyobutungi         | 12          | √         | √         |
|                  | Christopher Khayeka-Wandabwa | 12          | √         |           |
|                  | Gershim Asiki                | 12          | √         | √         |
|                  | Isaac Kisiangani             | 12          | √         | √         |
|                  | Shukri Mohamed               | 12          | √         | √         |
| <b>DIMAMO</b>    | Marianne Alberts §           | 14          | √         | √         |
|                  | Solomon Choma                | 14          |           | √         |
|                  | Felistas Mashinya            | 14          | √         |           |
|                  | Given Mashaba                | 14          |           | √         |
| <b>Nanoro</b>    | Halidou Tinto                | 13          | √         | √         |
|                  | Herman Sorgho                | 13          | √         | √         |
|                  | Palwendé Romuald Boua        | 13          | √         | √         |
| <b>Navrongo</b>  | Abraham R Oduro              | 11          | √         | √         |
|                  | Godfred Agongo               | 11          | √         | √         |
|                  | Cornelius Debpuur            | 11          | √         | √         |
|                  | Engelbert Nonterah           | 11          | √         | √         |
| <b>Soweto</b>    | Shane A Norris               | 5, 6        | √         | √         |
|                  | Lisa Micklesfield            | 5           | √         | √         |
|                  | Vukosi Baloyi                | 5           | √         | √         |
| <b>Wits/WHC</b>  | Michèle Ramsay               | 2, 4        | √         | √         |
|                  | Ananyo Choudhury             | 2           | √         | √         |
|                  | Busisiwe Mthembu             | 2           |           | √         |
|                  | Cassandra Soo                | 2           | √         | √         |
|                  | Dhriti Sengupta              | 2           | √         | √         |
|                  | Ernest Tambo                 | 2           | √         |           |
|                  | Francisco Camiña Ceballos    | 2           | √         |           |

|                |                          |        |   |   |
|----------------|--------------------------|--------|---|---|
|                | Freedom Mukomana         | 2      | √ | √ |
|                | Furahini Tluway          | 2      |   | √ |
|                | Henry Wandera            | 2      | √ | √ |
|                | Himla Soodyall           | 4      | √ |   |
|                | Jean-Tristan Brandenburg | 2      | √ |   |
|                | Natalie Smyth            | 2      | √ | √ |
|                | Nigel Crowther           | 16     | √ | √ |
|                | Ovokeraye Oduaran        | 2      | √ | √ |
|                | Scott Hazelhurst         | 2, 9   | √ | √ |
|                | Stuart Ali               | 2      | √ | √ |
|                | Theo Mathema             | 2      | √ | √ |
|                | Tinashe Chikowore        | 2      | √ |   |
|                | Yaniv Swiel              | 2, 9   | √ | √ |
|                | Zané Lombard             | 4      | √ |   |
| <b>INDEPTH</b> | Osman Sankoh             | 8      | √ |   |
| <b>UG</b>      | Pauline Tindana          | 11, 15 | √ | √ |

§ Deceased

### Affiliations

2. Sydney Brenner Institute for Molecular Bioscience, University of the Witwatersrand, Johannesburg, South Africa
4. Division of Human Genetics, School of Pathology, Faculty of Health Sciences, University of the Witwatersrand, Johannesburg, South Africa
5. SAMRC/Wits Developmental Pathways for Health Research Unit, Faculty of Health Sciences, University of the Witwatersrand, Johannesburg, South Africa.
6. School of Human Development and Health, University of Southampton, Southampton, United Kingdom
7. SAMRC/Wits Rural Public Health and Health Transitions Research Unit (Agincourt), School of Public Health, Faculty of Health Sciences, University of the Witwatersrand, Johannesburg, South Africa
8. INDEPTH Network, East Legon, Accra, Ghana
9. School of Electrical & Information Engineering, University of the Witwatersrand, Johannesburg, South Africa
11. Navrongo Health Research Centre, Navrongo, Ghana
12. African Population and Health Research Centre, Nairobi, Kenya
13. Clinical Research Unit of Nanoro, Institut de Recherche en Sciences de la Santé, Nanoro, Burkina Faso
14. School of Health Care Sciences, Faculty of Health Sciences, University of Limpopo, Polokwane, South Africa.
15. School of Public Health, University of Ghana, Accra, Ghana.
16. Department of Chemical Pathology, National Health Laboratory Service, Faculty of Health Sciences, University of the Witwatersrand, Johannesburg, South Africa.
